1 **Ancient origin and evolution of microbial mercury methylation**

2

3

4 Heyu Lin<sup>1</sup>, Edmund R. R. Moody<sup>2</sup>, Tom A. Williams<sup>3</sup> and John W. Moreau<sup>1,4,\*</sup>

5

6 <sup>1</sup>School of Geographical, Atmospheric and Earth Sciences, The University of Melbourne,

7 Parkville, Victoria 3010, Australia

8 <sup>2</sup>School of Earth Sciences, University of Bristol, Bristol, BS8 1RJ, United Kingdom

9 <sup>3</sup>School of Biological Sciences, University of Bristol, Bristol, BS8 1TQ, United Kingdom

10 <sup>4</sup>School of Geographical and Earth Sciences, University of Glasgow, Glasgow, G12 8RZ,

11 United Kingdom

12

13

14 **KEYWORDS:** mercury, methylmercury, evolution, antimicrobial, *hgc* gene, gene loss,

15 horizontal gene transfer, LUCA

16

17 \*Author for Correspondence: John W. Moreau, School of Geographical and Earth Sciences,

18 University of Glasgow, Glasgow, United Kingdom, +44 141 330 5461,

19 [john.moreau@glasgow.ac.uk](mailto:john.moreau@glasgow.ac.uk)

## 20 **Abstract**

21           The origin and evolution of microbial mercury methylation have long remained a  
22 mystery. Here we employed genome-resolved phylogenetic analyses to decipher the evolution  
23 of the mercury methylating genes *hgcAB*, to constrain the ancestral origin of the *hgc* operon,  
24 and to explain its current distribution across the bacterial and archaeal domains. We infer the  
25 extent to which vertical descent and horizontal gene transfer have influenced the evolution of  
26 this operon and hypothesize that the original function of methylmercury was as an  
27 antimicrobial compound on the early Earth. We speculate that subsequent evolution of the  
28 detoxifying agent alkylmercury lyase (*merB*) reduced the selective advantage of the mercury  
29 methylation activity, resulting in widespread loss of the *hgcAB* genes among archaea and  
30 bacteria.

31

## 32 **Significance**

33           Neurotoxic methylmercury ( $\text{MeHg}^+$ ) is synthesized from  $\text{Hg}^{\text{II}}$  in the environment by  
34 microorganisms, involving the gene pair *hgcA* and *hgcB*. However, the origin and evolution  
35 of these two genes are poorly understood. Our phylogenetic analyses revealed the  
36 evolutionary history of the *hgc* gene pair and uncovered a link between the evolution of Hg  
37 methylation and demethylation. We show that the *hgc* gene has undergone generally vertical  
38 evolution with extensive parallel gene loss, and we propose that mercury methylation evolved  
39 as an antimicrobial production mechanism during competition for limited energy resources on  
40 the early Earth.

41

## 42 Introduction

43 Microorganisms play key roles in the global mercury cycle. In soils, sediments and  
44 natural waters, microbes mediate the enzymatic reductive volatilization of  $\text{Hg}^{\text{II}}$  to  $\text{Hg}^0$ , the  
45 transformation of aqueous  $\text{Hg}^{\text{II}}$  to  $\text{MeHg}^+$ , the complexation of aqueous  $\text{Hg}^{\text{II}}$  by bacteriogenic  
46 bisulfide, and the adsorption/desorption of  $\text{Hg}^{\text{II}}$  on/from biogenic metal ox(yhydrox)ides (e.g.,  
47 Barkay et al. 2003; Barkay & Gu 2022; Barkay & Wagner-Döbler 2005; Gilmour et al.  
48 2013; Hsu-Kim et al. 2013; Tebo et al. 2004; Wang et al. 2022). Essentially, microbes control  
49 or strongly influence the geochemical speciation of mercury in most natural environments  
50 today.

51 Both industrial and geological sources contribute mercury to the environment (Liu et  
52 al. 2011). Industrial mercury sources include fossil fuel combustion, mining, cement  
53 production and waste incineration (AMAP Assessment 2011); natural sources primarily  
54 involve geothermal activity. In fact, volcanos and hot springs have emitted mercury  
55 throughout geologic time since Earth's earliest geologic history (Grasby et al. 2019; Zerkle et  
56 al. 2020, 2021). Following the widespread oxygenation of the early ~2.4 billion years ago,  
57  $\text{Hg}^{\text{II}}$  would therefore be commonly found as a trace metal in hydrothermal environments.  
58 Thermophiles, as the Earth's earliest microorganisms, would presumably have needed some  
59 defense mechanism against the toxicity of  $\text{Hg}^{\text{II}}$ , i.e., to cope with its affinity for protein  
60 sulfhydryl groups and the resulting destabilization of enzymes. Previous studies present  
61 phylogenetic support for a thermophilic bacterial origin of the *mer* operon, acquired later in  
62 Archaea through multiple independent transfer events reflecting the environmental ubiquity of  
63 aqueous mercury (Barkay et al. 2010; Boyd & Barkay 2012).

64 Microbial mercury methylation has received much attention because  $\text{MeHg}^+$  is a  
65 potent neurotoxin that bioaccumulates across both marine and terrestrial food webs (Kidd et  
66 al. 2012). However, the origin of this process has remained a mystery, largely because  $\text{MeHg}^+$

67 serves no known biological function. Mercury methylation is encoded by the *hgc* operon,  
68 most closely related to the ancient carbon monoxide dehydrogenase/acetyl-CoA synthase  
69 gene, *cdh*, which has previously been suggested as being present in the Last Universal  
70 Common Ancestor (LUCA) (Adam et al. 2018; Parks et al. 2013; Sousa & Martin 2014;  
71 Weiss et al. 2018). CdhD and CdhE (hereafter “CdhDE”) are cobalamin-dependent proteins  
72 present in a highly conserved operon in genomes enabling methyl transfer in the Wood-  
73 Ljungdahl (WL) pathway for autotrophic carbon assimilation (Svetlitchnaia et al. 2006).  
74 While HgcA is also predicted to be a cobalamin-dependent methyltransferase, it only  
75 functions in Hg<sup>II</sup> methylation and does not take part in the WL pathway, as other components  
76 of this pathway are incomplete in characterised *hgcA*-carrying genomes (Date et al. 2019).  
77 Similar to *cdh*, the *hgc* gene seems to be broadly distributed across the bacterial and archaeal  
78 domains, representing a range of environmental habitats across redox gradients (McDaniel et  
79 al. 2020; Capo et al. 2022). Some of these bacterial and archaeal phyla have been  
80 experimentally confirmed to methylate Hg<sup>II</sup><sub>(aq)</sub>, while others are still being considered as  
81 putative methylators encoding homologous *hgcAB* sequences that have not yet been  
82 experimentally validated. In lieu of cultivated isolates, computational modelling has been  
83 employed to test for consistency of putative HgcAB sequences with the HgcAB structure and  
84 functionality of confirmed methylators (Gionfriddo et al. 2016; Lin et al. 2021).

85 Many studies of mercury methylation have focused on environmental factors  
86 influencing Hg<sup>II</sup><sub>(aq)</sub> bioavailability for uptake by methylating cells. In addition, previous  
87 efforts to identify the biochemical mechanism of Hg<sup>II</sup><sub>(aq)</sub> methylation have attributed the  
88 process to 1) accidental enzymatic catalysis of a methyl group transfer to Hg<sup>II</sup><sub>(aq)</sub> during either  
89 acetyl co-A formation (Choi et al. 1994) or methionine synthesis (Siciliano & Lean 2002), or  
90 2) an as-yet unidentified pathway (Ekstrom et al. 2003). Here we focus on understanding the  
91 more elusive origin and evolution of mercury methylating genes, employing genome-resolved

92 phylogenetic analyses to constrain the ancestral origin of the *hgc* operon and explain its  
93 currently known distribution across the bacterial and archaeal domains. We assess the extent  
94 to which vertical descent and horizontal gene transfer have shaped the evolution of the *hgc*  
95 operon and offer a novel hypothesis for the functional origin of microbial mercury  
96 methylation.

97

## 98 **Results and Discussion**

### 99 ***hgc* genes originated prior to LUCA**

100 A dataset containing 478 protein sequences belonging to the protein family PF03599  
101 was retrieved from UniProt Reference Proteomes database v2022\_03 (Chen et al. 2011) at  
102 35% cutoff (RP35) to study the phylogeny of the protein family (**Supplementary Table S1 &**  
103 **S2**). Phylogenetic reconstruction of the protein family PF03599 defined three deep-branching  
104 clusters, comprising HgcA, CdhD, and CdhE (**Figure 1A**, for details see **Figure S1**). On the  
105 hypothesis that CdhD- and CdhE-encoding genes were already present in LUCA (Adam et al.  
106 2018; Sousa & Martin 2014; Weiss et al. 2018), then HgcA also branched prior to LUCA  
107 (that is, the divergence between these three protein subfamilies must pre-date LUCA; **Figure**  
108 **1A**). While robustly rooting single gene trees is challenging, midpoint, Minvar (Mai et al.  
109 2017) and MAD (Tria et al. 2017) rooting approaches all suggest that the root of this protein  
110 family lies between CdhD and CdhE+HgcA. In comparison to CdhD and CdhE, which have a  
111 relatively broad distribution across modern prokaryotes and broadly congruent evolutionary  
112 histories, *hgcA* genes have a more restricted distribution in extant taxa. They are mainly found  
113 in Bacteria, although with a more restricted distribution than in Archaea (**Figure 1A**), mostly  
114 affiliated with Deltaproteobacteria, Firmicutes, and FCB group (**Figure 1A**). Based on the  
115 rooted tree (**Figure 1B**), HgcA has a longer stem than CdhD and CdhE, which might be the

116 result of accelerated evolution (for example, associated with a change in function) or as a  
117 result of gene loss (or lineage extinction) in former HgcA-encoding clades.

118

### 119 ***hgcA* evolved primarily vertically with extensive loss**

120 To investigate the evolutionary history of HgcA, we further enlarged the sample size  
121 by retrieving HgcA homologs in UniProt Reference Proteomes database v2022\_03 at 75%  
122 cutoff (RP75). Two other datasets, including one containing 700 representative prokaryotic  
123 proteomes constructed by Moody et al. (2022) and another containing several novel *hgc*-  
124 carriers published by Lin et al. (2021), were retrieved and incorporated into the RP75 dataset.  
125 Totally 169 HgcA sequences were collected after removing redundancies (**Supplementary**  
126 **Table S1**). Our analysis suggests that *hgcA* genes were separated into two well-supported  
127 clades with high bootstrap support, as shown in **Figure 1A** and **Figure 2** (for details see  
128 **Figure S2**). These two clades correspond to a difference in gene structure: the smaller clade  
129 comprises genes in which HgcA and HgcB became fused to form a HgcAB gene, while the  
130 larger contains single domain HgcA genes. Several Asgard archaea, including Thorarchaeota  
131 and Lokiarchaeota, form a clade in the HgcAB subtree, suggesting that the gene fusion  
132 occurred prior to the radiation of Asgard phyla. The fused-HgcAB from *Pyrococcus furiosus*  
133 has been experimentally tested and shown not to methylate Hg (Podar et al. 2015), but the  
134 functionality of other fused-HgcAB proteins is yet to be confirmed. Except for those fused-  
135 HgcAB carriers, the functionality of other members in this clade is also unknown. For  
136 example, *Nitrospina*-like HgcA sequences have been reported as the dominant HgcA  
137 homologs in many marine environments (Gionfriddo et al. 2016; Tada et al. 2020; Villar et al.  
138 2020; Tada et al. 2021). However, the functionality of these sequences has not yet been  
139 experimentally confirmed, as no known *hgc+* members of this genus are currently held in  
140 isolation. Also, the alphaproteobacterium *Breoghanian* sp. L-A4 is the only aerobic *hgcA+*

141 (fused-*hgcAB*+) microorganism found in this analysis, and its methylation capacity under  
142 aerobic conditions also remains unexplored.

143 By contrast, the majority of (non-fused) HgcA sequences form a clade which broadly  
144 follows the universal tree (**Figure 2**). In particular, the deepest split lies between archaeal and  
145 bacterial HgcA homologs. Taken together with the sister relationship of HgcA to CdhD/E,  
146 this is consistent with a pre-LUCA origin for the HgcA gene. However, the taxonomic  
147 distribution of HgcA in modern Bacteria is patchy (being found mainly in Firmicutes,  
148 Deltaproteobacteria, and the FCB group). Therefore, if HgcA was indeed present in LUCA,  
149 and its gene tree traces the divergence of Archaea and Bacteria, we infer that it must have  
150 been lost subsequently in the other bacterial lineages.

151 Gene loss is a major force driving microbial genome evolution (Bolotin & Hershberg  
152 2016), reflecting environmental change and/or adaptation (Koskiniemi et al. 2012). So far,  
153 *hgcA*+ Hg methylators have only been reported for anoxic or suboxic environments (Capo et  
154 al. 2022; Lin et al. 2021; Parks et al. 2013). During the evolution of Hg methylators, changes  
155 in reduction-oxidation potential might have inhibited Hg methylation and constituted an  
156 environmental selective pressure that facilitated the loss of *hgcA* genes. In addition, the long  
157 branches of the HgcA subtree in comparison to CdhD/E also suggest that they were subject to  
158 a weaker natural selection for gene maintenance, and were more likely to be lost in genetic  
159 drift, a common scenario observed for many microorganisms (Bolotin & Hershberg 2016).

160 A few putative HGT events could be inferred from the larger clade of the HgcA tree  
161 e.g., Marinimicrobia-HgcA clustered with Euryarchaeota-HgcA in the archaeal cluster,  
162 suggesting possible acquisition of *hgcA* via HGT. However, HGT does not appear to be the  
163 main driver for *hgcA* evolution, since only a few transfers were inferred.

164

## 165 ***hgcA* and *hgcB* co-evolved**

166           The gene *hgcB* is nearly always located immediately downstream of *hgcA*, with rare  
167 cases of being one gene apart (Gilmour et al. 2018). A lack of either *hgcA* or *hgcB* in a  
168 genome is thought to render the microbial host incapable of Hg methylation (Parks et al.  
169 2013). Therefore, the gene pair *hgcAB* likely evolved together as a conserved operon.  
170 Although the *hgcB* tree was poorly resolved due to short gene sequence length (95 amino  
171 acids on average), the overall topologies of the *hgcB* tree and the *hgcA* tree were congruent,  
172 supporting this inference (**Figure 3**, for details see **Figure S3**). Nevertheless, several *hgcA*+  
173 genomes did not carry neighbouring *hgcB* genes, including all *Nitrospina* and a few  
174 Deltaproteobacteria and Firmicutes, potentially because of gene loss during evolution or  
175 incomplete transfer events (i.e., only *hgcA* genes were acquired during the HGT events).  
176 Another exception is that a complete *hgcB* gene is present downstream of the fused-*hgcAB*  
177 gene in the genome of the deltaproteobacterial endosymbiont Delta1. This complete HgcB  
178 protein had the longest branch length of the HgcB tree, and was located in a sister cluster of  
179 the ‘HgcB tail’ in the fused-HgcAB from the same host, suggesting the possible acquisition of  
180 this gene from closely related microorganisms through HGT.

181

## 182 **Phylogenetic distribution of *merB* and its relationship to *hgc***

183           The *merB* gene encoding organomercury lyase catalyzes the protonolysis of the C-Hg  
184 bond in  $\text{MeHg}^+$  and releases  $\text{Hg}^{\text{II}}$  (Boyd & Barkay 2012), an opposite process to the reaction  
185 catalyzed by HgcAB proteins. Totally 225 MerB sequences were retrieved from the RP35  
186 dataset (**Supplementary Table S2**). MerB homologs were distributed across both the  
187 bacterial and archaeal domains (**Figure 4**, for details see **Figure S4**), with most  
188 representatives found in Terrabacteria (including Actinobacteria, Firmicutes, and Chloroflexi)



189 and Proteobacteria (including Alphaproteobacteria, Betaproteobacteria, and  
190 Gammaproteobacteria). In contrast, only a small number of archaea, including a few  
191 Euryarchaeota and one thaumarchaeon, were found to encode MerB. These archaeal MerB  
192 homologs fall into bacterial clades, and are not monophyletic. This suggests a bacterial origin  
193 of MerB homologs, with transfers into the archaeal domain occurring subsequently. This  
194 interpretation aligns with the previous hypothesis that merB was recruited from a mesophilic  
195 ancestor recently instead of from LUCA (Christakis et al. 2021).

196 We mapped the presence/absence of *merB* and *hgc* genes onto the Tree of Life  
197 (**Figure 5**, for details see **Figure S5**) to illustrate their phylogenetic relationship. Intriguingly,  
198 although the distribution of MerB homologs overlapped with HgcAB homologs, few genomes  
199 encode both MerB and HgcAB. Taken together with their opposing activities, this  
200 complementary distribution pattern, in which genomes tend to encode either HgcAB or MerB,  
201 but not both, suggests a functional conflict between these two genes (i.e., there is utility in  
202 encoding for one or the other activity, but not both). Nevertheless, a few genomes encoding  
203 both MerB and HgcAB were observed, in which the capability of both Hg methylation and  
204 demethylation by *Citri fermentans bemidjiense* Bem was addressed before (Lu et al. 2016),  
205 suggesting a potential for both Hg methylation and demethylation among some anaerobic  
206 bacteria. The phylogeny and phylogenetic distribution of these enzymes (**Figure 4 & Figure**  
207 **5**) suggests that HgcAB was the earlier of the two activities to evolve, with MerB originating  
208 more recently and spreading by horizontal gene transfer.

209

## 210 **Mercury methylation as antimicrobial synthesis by early Earth microbes?**

211 The reason(s) why microorganisms evolved to methylate Hg<sup>II</sup> to MeHg<sup>+</sup> has long been  
212 a mystery. Previous studies have proposed that the process conferred resistance to Hg<sup>II</sup>  
213 toxicity (Trevors 1986). In fact, the ability to produce MeHg<sup>+</sup> has been shown *not* to confer

214  $\text{Hg}^{\text{II}}$  resistance (Gilmour et al. 2011). Considering  $\text{MeHg}^+$  is the more toxic and stable form of  
215  $\text{Hg}^{\text{II}}$  compared to inorganic  $\text{Hg}^{\text{II}}$  (Jonas et al. 1984; Gilmour et al. 2011; IARC Working  
216 Group on the Evaluation of Carcinogenic Risks to Humans 1993), we hypothesise here that  
217  $\text{MeHg}^+$  could have been employed by early  $\text{Hg}^{\text{II}}$  methylators as an antimicrobial against  
218 microorganisms without the ability to metabolize/detoxify this organometallic compound. We  
219 note also that the greater lipophilicity of  $\text{MeHg}^+$  over  $\text{Hg}^{2+}$  would have allowed the former to  
220 penetrate cell walls more readily. As the *hgcAB* gene pair likely evolved in LUCA (**Figure**  
221 **1A**),  $\text{Hg}^{\text{II}}$  methylation could have stabilised to persist as an early form of antimicrobial  
222 production. Microorganisms have evolved a wide range of attack mechanisms to compete  
223 against other microbes for limited resources (Granato et al. 2019), and our hypothesis for  
224 mercury methylation as antimicrobial production mirrors a similar hypothesis recently put  
225 forward for *arsM*, a gene that encodes for arsenic methylation (Li et al. 2021).

226 As a response, other microorganisms may have evolved alkylmercury lyase encoded  
227 by *merB* as a defense against  $\text{MeHg}^+$ , while  $\text{Hg}^{2+}$  toxicity could be mitigated via other  
228 detoxification systems, e.g., MerA (Boyd & Barkay 2012), iron-coupled redox reactions (Liu  
229 & Wiatrowski 2018), abiotic reduction (Gu et al. 2011), or other mechanisms (Christakis et al.  
230 2021). Once *merB* evolved, however, *hgcAB* may no longer have offered a selective  
231 advantage, and therefore underwent extensive loss during vertical evolution, as inferred by  
232 our study. Furthermore, we speculate that bacteria carrying other  $\text{MeHg}^+$  detoxification  
233 mechanisms might not need to co-carry *merB* genes; this would explain why MerB homologs  
234 are rarely found in sulfate-reducing bacteria (SRB), for example, as SRB produce aqueous  
235 bisulfide ( $\text{HS}^-$ ) that can transform  $\text{MeHg}^+$  to volatile dimethylmercury (DMHg) which is then  
236 removed quickly from the cell (Jonsson et al. 2016). Other studies have observed that  $\text{MeHg}^+$   
237 can be rapidly exported from methylating cells after production, and therefore might not  
238 accumulate within methylators (Graham et al. 2012; Lin et al. 2015). However, the

239 mechanisms underpinning  $\text{MeHg}^+$  export are still poorly understood. Interestingly,  
240 extracellular thiol compounds, such as cysteine, were found to facilitate export and desorption  
241 of  $\text{MeHg}^+$  (Lin et al. 2015), possibly due to competitive binding of thiols to receptors on  
242  $\text{MeHg}^+$  transporters. To the best of our knowledge, only two proteins encoded by *mer*  
243 operons, MerC (Sone et al. 2017) and MerE (Sone et al. 2013), have been reported as  
244 potential  $\text{MeHg}^+$  transporters, but neither of them is carried by Hg methylators. Therefore,  
245 potential cellular transporters for  $\text{MeHg}^+$  in Hg methylators should be investigated in future  
246 studies.

247 Our study reveals an ancient origin for microbial mercury methylation, evolving from  
248 LUCA to radiate extensively throughout the tree of life both vertically, albeit with extensive  
249 loss, and to a lesser extent horizontally. We hypothesise that early mercury methylating  
250 microorganisms may have innovatively transformed a ubiquitous aqueous trace metal,  $\text{Hg}^{\text{II}}$   
251 sourced originally from geothermal activity, into a highly effective antimicrobial compound  
252 with the ability to enter cells and deactivate enzymes. Prior to the evolution of genomic  
253 countermeasures such as *merB*,  $\text{MeHg}^+$  concentrations in aqueous environments could have  
254 increased to toxic levels beyond those typically found in natural environments today, where  
255 they are typically constrained by demethylation. We speculate therefore that microbial Hg  
256 methylation today represents a vestige of early geosphere-biosphere and microbe-microbe  
257 interactions with profound consequences for Earth's biogeochemical mercury cycle.

## 258 **Materials and Methods**

### 259 **Dataset construction**

260 UniProt Reference Proteomes v2022\_03 (Chen et al. 2011) at 35% cutoff (RP35) and  
261 75% cut-off (RP75) were used to establish two datasets. The RP35 dataset contained 5,535  
262 proteomes and was used to study the phylogeny of protein family PF03599 (CdhD, CdhE and

263 HgcA) and PF03243 (MerB). The RP75 dataset contained 17,551 proteomes and was used to  
264 study the phylogeny of HgcA individually. In order to enlarge the diversity and sample size of  
265 HgcA sequences, two other datasets, including one containing 700 representative prokaryotic  
266 proteomes constructed by Moody et al. (2022) and another containing several novel *hgc*-  
267 carriers published by Lin et al. (2021), were retrieved and incorporated into the RP75 dataset,  
268 followed by removal of any redundancies. HgcAB proteins selected for this study including  
269 their metadata are listed in Supplementary Table S1; Other proteins including CdhD, CdhE,  
270 and MerB used in this study are listed in Supplementary Table S2.

271

## 272 **Determination of genes of interest**

273 Protein sequences belonging to protein families PF03599 and PF03243 from both  
274 datasets were determined according to annotation by UniProt and also confirmed with  
275 hmmsearch v3.1 (Eddy 1998) against curated HMM models provided by InterPro  
276 (<https://www.ebi.ac.uk/interpro/entry/pfam>). HgcA sequences were extracted from the  
277 PF03599 family using hmmsearch against the Hg-MATE database (Capo et al. 2022) and  
278 further determined by the conserved motif N(V/I)WC(A/S). CdhD and CdhE sequences were  
279 extracted from the PF03599 family using blastp v2.11.0 against the experimentally validated  
280 CdhD (Q57577) and CdhE (Q57576) sequences from *Methanocaldococcus jannaschii* JAL-1,  
281 respectively. HgcB sequences were determined by searching for 4Fe4S proteins encoded by  
282 genes adjacent to *hgcA* genes (two open reading frames on either side of *hgcA*) in the genome.  
283 MerB sequences were further confirmed from the PF03243 protein family by hmmsearch  
284 against the MerB database constructed by Christakis et al. (2021).

285

## 286 **Reconstruction of phylogenetic trees**

287 Protein sequences belonging to the PF03599 protein family and included in the RP35  
288 dataset were aligned using MAFFT-linsi v7.453 (Katoh & Standley 2013), resulting in an  
289 alignment containing 478 sequences with 2922 columns. The alignment was used to build a  
290 maximum likelihood (ML) tree using IQ-TREE v2.0.3 (Schmidt et al. 2014) under the best-  
291 fitting model of LG+C50+F+R. Branch supports were estimated with 1000 ultrafast bootstrap  
292 (Hoang et al. 2018) replicates (**Figure 1**) The unrooted tree was rooted using three methods:  
293 Midpoint-rooting (Swofford et al. 1996), Minimum Variance (MinVar, Mai et al. 2017), and  
294 Minimal Ancestor Deviation (MAD, Tria et al. 2017), respectively. Similar to the methods  
295 described above, all trees in this study were built using IQ-TREE v2.0.3 (Schmidt et al. 2014)  
296 with 1000 ultrafast bootstrap (Hoang et al. 2018) replications. Protein sequences were aligned  
297 using MAFFT (L-INS-i) v7.453 (Katoh & Standley 2013).

298 To mitigate potential contamination of HgcB tail sequences in the HgcA alignment,  
299 the fused HgcAB proteins were aligned separately and the ‘HgcB tail’ (last 79 positions) was  
300 manually removed. The resulting ‘HgcA head’ of the fused HgcAB proteins was aligned with  
301 other HgcA sequences. Finally, aligned ‘HgcB tail’ sequences were subsequently added back  
302 to the alignment. The first 327 positions of the alignment were poorly aligned, therefore  
303 manually removed. The final alignment contained 169 sequences with 493 columns and was  
304 used to infer a ML tree under the LG+C60+F+G model (**Figure 2**). The tree was rerooted  
305 between the two major groups of HgcA sequences according to the above PF03599 protein  
306 family tree.

307 HgcB sequences and ‘HgcB tail’ sequences from the fused HgcAB proteins were  
308 aligned and used to infer a ML tree using a similar method as the PF03599 protein family tree  
309 described above under the LG+C60+F+G model. Phylogenetic congruence between the HgcA  
310 and the HgcB sequences was inferred and visualized using cophylo implemented in the R

311 package phytools v1.0-3 (Revell 2012) based on the topology of the HgcA and the HgcB ML  
312 trees described above. Nodes of both HgcA and HgcB trees were allowed to be rotated by the  
313 program to optimize vertical matching of tips (**Figure 3**).

314 MerB sequences from the RP35 database were aligned and used to build a ML tree  
315 under the best-fit protein model LG+C40+F+G chosen according to BIC. Two MerA proteins  
316 (P08332.1 from *Shigella flexneri* and P16171.1 from *Bacillus cereus*) were used as an  
317 outgroup to root the tree (**Figure 4**).

318 A species tree of *hgc+* and *merB+* proteomes (251 proteomes in total) from the RP35  
319 database was reconstructed based on the 27 marker genes proposed by Moody et al. (2022).  
320 27 HMM profiles were created individually based on marker gene alignments and  
321 concatenated using HMMER v3.1. The 27 marker homologs in the 251 proteomes were  
322 extracted by hmmsearch against the concatenated hmm profile with an E-value of 1e-10. The  
323 27 marker homologs were then aligned respectively and concatenated. Poorly aligned regions  
324 were trimmed using trimAl v1.2 (Silla-Martínez et al. 2009) with parameters “-resoverlap  
325 0.55 -seqoverlap 60 -automated1”. The resulting supermatrix (8024 sites) was used to infer a  
326 ML tree under the model of LG+F+R10 (**Figure 5**). All phylogenetic trees described above  
327 were visualized using iTOL v6 (Letunic & Bork 2021) and refined with Adobe Illustrator  
328 (Adobe Systems Inc., San Jose, CA, USA).

## 329 **Data availability**

330 All data generated in this study including amino acid alignments and phylogenetic  
331 trees are deposited in Figshare: <https://doi.org/10.6084/m9.figshare.21428523>

## 332 **Acknowledgments**

333 We thank Yao-ban Chan and Qiuyi Li at The University of Melbourne for valuable  
334 discussions and advice in the early stage of this study. We also acknowledge helpful  
335 discussions with Caitlin Gionfriddo, Ben Peterson, and Eric Capo. A special thank goes to the  
336 members of Mersorcium network (<https://mersorcium.github.io/>) for extensive discussions.  
337 This publication was made possible in part through support from start-up funding from the  
338 University of Glasgow to J.W.M., the Moore Foundation  
339 (<https://doi.org/10.37807/GBMF9741> to T.A.W.), the Royal Society (URF\R\201024) to  
340 T.A.W., and the John Templeton Foundation (62220 to T.A.W. and E.R.R.M.). The opinions  
341 expressed in this publication are those of the author(s) and do not necessarily reflect the views  
342 of the John Templeton Foundation.

## 343 **References**

- 344 Adam PS, Borrel G, Gribaldo S. 2018. Evolutionary history of carbon monoxide  
345 dehydrogenase/acetyl-CoA synthase, one of the oldest enzymatic complexes. *Proc. Natl. Acad. Sci.* 115:E1166–E1173. doi: 10.1073/pnas.1716667115.
- 347 AMAP Assessment. 2011. *Mercury in the Arctic. Arctic Monitoring and Assessment*  
348 *Programme (AMAP)*. Oslo, Norway.
- 349 Barkay T, Gu B. 2022. Demethylation—the other side of the mercury methylation coin: A  
350 critical review. *ACS Environ. Au.* 2:77–97. doi: 10.1021/acsenvironau.1c00022.
- 351 Barkay T, Kritee K, Boyd E, Geesey G. 2010. A thermophilic bacterial origin and subsequent  
352 constraints by redox, light and salinity on the evolution of the microbial mercuric reductase.  
353 *Environ. Microbiol.* 12:2904–2917. doi: 10.1111/j.1462-2920.2010.02260.x.
- 354 Barkay T, Miller SM, Summers AO. 2003. Bacterial mercury resistance from atoms to  
355 ecosystems. *FEMS Microbiol Rev.* 27:355–384. doi: 10.1016/s0168-6445(03)00046-9.
- 356 Barkay T, Wagner Döbler I. 2005. Microbial Transformations of Mercury: Potentials,  
357 Challenges, and Achievements in Controlling Mercury Toxicity in the Environment. In:  
358 *Advances in Applied Microbiology Volume 57. Advances in Applied Microbiology* pp. 1–52.
- 359 Bolotin E, Hershberg R. 2016. Bacterial intra-species gene loss occurs in a largely clocklike  
360 manner mostly within a pool of less conserved and constrained genes. *Sci. Rep.* 6:35168. doi:  
361 10.1038/srep35168.

- 362 Boyd E, Barkay T. 2012. The mercury resistance operon: from an origin in a geothermal  
363 environment to an efficient detoxification machine. *Front. Microbiol.* 3. doi:  
364 10.3389/fmicb.2012.00349.
- 365 Capo E et al. 2022. A consensus protocol for the recovery of mercury methylation genes from  
366 metagenomes. *Mol. Ecol. Resour.* 1–15. doi: 10.1111/1755-0998.13687.
- 367 Chen C et al. 2011. Representative proteomes: a stable, scalable and unbiased proteome set  
368 for sequence analysis and functional annotation. *PLOS ONE.* 6:e18910. doi:  
369 10.1371/journal.pone.0018910.
- 370 Choi S-C, Chase T, Bartha R. 1994. Metabolic pathways leading to mercury methylation in  
371 *Desulfovibrio desulfuricans* LS. *Appl. Environ. Microbiol.* 60:4072–4077. doi:  
372 10.1128/aem.60.11.4072-4077.1994.
- 373 Christakis CA, Barkay T, Boyd ES. 2021. Expanded diversity and phylogeny of mer genes  
374 broadens mercury resistance paradigms and reveals an origin for mera among thermophilic  
375 archaea. *Front. Microbiol.* 12. doi: 10.3389/fmicb.2021.682605.
- 376 Date SS et al. 2019. Kinetics of enzymatic mercury methylation at nanomolar concentrations  
377 catalyzed by HgcAB. *Appl Env. Microbiol.* doi: 10.1128/AEM.00438-19.
- 378 Eddy SR. 1998. Profile hidden Markov models. *Bioinformatics.* 14:755–763. doi:  
379 10.1093/bioinformatics/14.9.755.
- 380 Ekstrom EB, Morel FMM, Benoit JM. 2003. Mercury methylation independent of the acetyl-  
381 coenzyme A pathway in sulfate-reducing bacteria. *Appl Env. Microbiol.* 69:5414–5422. doi:  
382 10.1128/aem.69.9.5414-5422.2003.
- 383 Gilmour CC et al. 2013. Mercury methylation by novel microorganisms from new  
384 environments. *Env. Sci Technol.* 47:11810–20. doi: 10.1021/es403075t.
- 385 Gilmour CC et al. 2011. The sulfate-reducing bacterium *Desulfovibrio desulfuricans* ND132  
386 as a model for understanding bacterial mercury methylation. *Appl Env. Microbiol.* 77:3938–  
387 51. doi: 10.1128/AEM.02993-10.
- 388 Gilmour CC, Bullock AL, McBurney A, Podar M, Elias DA. 2018. Robust mercury  
389 methylation across diverse methanogenic *Archaea*. *MBio.* 9. doi: 10.1128/mBio.02403-17.
- 390 Gionfriddo CM et al. 2016. Microbial mercury methylation in Antarctic sea ice. *Nat*  
391 *Microbiol.* 1:16127. doi: 10.1038/nmicrobiol.2016.127.
- 392 Graham AM et al. 2012. Detailed Assessment of the Kinetics of Hg-Cell Association, Hg  
393 Methylation, and Methylmercury Degradation in Several *Desulfovibrio* Species. *Appl.*  
394 *Environ. Microbiol.* 78:7337–7346. doi: 10.1128/AEM.01792-12.
- 395 Granato ET, Meiller-Legrand TA, Foster KR. 2019. The evolution and ecology of bacterial  
396 warfare. *Curr. Biol.* 29:R521–R537. doi: 10.1016/j.cub.2019.04.024.
- 397 Grasby SE, Them TR, Chen Z, Yin R, Ardakani OH. 2019. Mercury as a proxy for volcanic  
398 emissions in the geologic record. *Earth-Sci. Rev.* 196:102880. doi:  
399 10.1016/j.earscirev.2019.102880.



- 400 Gu B et al. 2011. Mercury reduction and complexation by natural organic matter in anoxic  
401 environments. *Proc. Natl. Acad. Sci.* 108:1479–1483. doi: 10.1073/pnas.1008747108.
- 402 Hoang DT, Chernomor O, von Haeseler A, Minh BQ, Vinh LS. 2018. UFBoot2: Improving  
403 the ultrafast bootstrap approximation. *Mol. Biol. Evol.* 35:518–522. doi:  
404 10.1093/molbev/msx281.
- 405 Hsu-Kim H, Kucharzyk KH, Zhang T, Deshusses MA. 2013. Mechanisms regulating mercury  
406 bioavailability for methylating microorganisms in the aquatic environment: a critical review.  
407 *Env. Sci Technol.* 47:2441–56. doi: 10.1021/es304370g.
- 408 IARC Working Group on the Evaluation of Carcinogenic Risks to Humans. 1993. Mercury  
409 and Mercury Compounds. In: Beryllium, Cadmium, Mercury, and Exposures in the Glass  
410 Manufacturing Industry. Vol. 58 International Agency for Research on Cancer: Lyon (FR).
- 411 Jonas RB, Gilmour CC, Stoner DL, Weir MM, Tuttle JH. 1984. Comparison of methods to  
412 measure acute metal and organometal toxicity to natural aquatic microbial communities. *Appl.*  
413 *Environ. Microbiol.* 47:1005–1011.
- 414 Jonsson S, Mazrui NM, Mason RP. 2016. Dimethylmercury Formation Mediated by  
415 Inorganic and Organic Reduced Sulfur Surfaces. *Sci. Rep.* 6:27958. doi: 10.1038/srep27958.
- 416 Katoh K, Standley DM. 2013. MAFFT multiple sequence alignment software version 7:  
417 improvements in performance and usability. *Mol. Biol. Evol.* 30:772–780. doi:  
418 10.1093/molbev/mst010.
- 419 Kidd KA et al. 2012. Biomagnification of mercury through lake trout (*Salvelinus namaycush*)  
420 food webs of lakes with different physical, chemical and biological characteristics. *Sci. Total*  
421 *Environ.* 438:135–143. doi: 10.1016/j.scitotenv.2012.08.057.
- 422 Koskiniemi S, Sun S, Berg OG, Andersson DI. 2012. Selection-driven gene loss in bacteria.  
423 *PLOS Genet.* 8:e1002787. doi: 10.1371/journal.pgen.1002787.
- 424 Letunic I, Bork P. 2021. Interactive Tree Of Life (iTOL) v5: an online tool for phylogenetic  
425 tree display and annotation. *Nucleic Acids Res.* 49:W293–W296. doi: 10.1093/nar/gkab301.
- 426 Li YP et al. 2021. Antimicrobial Activity of Metals and Metalloids. *Annu. Rev. Microbiol.*  
427 75:175–197. doi: 10.1146/annurev-micro-032921-123231.
- 428 Lin H et al. 2021. Mercury methylation by metabolically versatile and cosmopolitan marine  
429 bacteria. *ISME J.* 15:1810–1825. doi: 10.1038/s41396-020-00889-4.
- 430 Lin H, Lu X, Liang L, Gu B. 2015. Thiol-Facilitated Cell Export and Desorption of  
431 Methylmercury by Anaerobic Bacteria. *Environ. Sci. Technol. Lett.* 2:292–296. doi:  
432 10.1021/acs.estlett.5b00209.
- 433 Liu G, Cai Y, O’Driscoll N, Feng X, Jiang G. 2011. Overview of mercury in the environment.  
434 In: *Environmental chemistry and toxicology of mercury*. John Wiley & Sons, Ltd pp. 1–12.  
435 doi: 10.1002/9781118146644.ch1.
- 436 Liu S, Wiatrowski HA. 2018. Reduction of Hg(II) to Hg(0) by biogenic magnetite from two  
437 magnetotactic bacteria. *Geomicrobiol. J.* 35:198–208. doi: 10.1080/01490451.2017.1362076.

- 438 Lu X et al. 2016. Anaerobic mercury methylation and demethylation by *Geobacter*  
439 *bemidjiensis* Bem. Env. Sci Technol. 50:4366–73. doi: 10.1021/acs.est.6b00401.
- 440 Mai U, Sayyari E, Mirarab S. 2017. Minimum variance rooting of phylogenetic trees and  
441 implications for species tree reconstruction. PLOS ONE. 12:e0182238. doi:  
442 10.1371/journal.pone.0182238.
- 443 McDaniel EA et al. 2020. Expanded phylogenetic diversity and metabolic flexibility of  
444 mercury-methylating microorganisms. mSystems. 5. doi: 10.1128/mSystems.00299-20.
- 445 Moody ER et al. 2022. An estimate of the deepest branches of the tree of life from ancient  
446 vertically evolving genes Perry, GH & Koonin, EV, editors. eLife. 11:e66695. doi:  
447 10.7554/eLife.66695.
- 448 Parks JM et al. 2013. The genetic basis for bacterial mercury methylation. Science. 339:1332–  
449 5. doi: 10.1126/science.1230667.
- 450 Podar M et al. 2015. Global prevalence and distribution of genes and microorganisms  
451 involved in mercury methylation. Sci Adv. 1:e1500675. doi: 10.1126/sciadv.1500675.
- 452 Revell LJ. 2012. phytools: an R package for phylogenetic comparative biology (and other  
453 things). Methods Ecol. Evol. 3:217–223. doi: 10.1111/j.2041-210X.2011.00169.x.
- 454 Schmidt HA, Minh BQ, von Haeseler A, Nguyen L-T. 2014. IQ-TREE: a fast and effective  
455 stochastic algorithm for estimating maximum-likelihood phylogenies. Mol Biol Evol. 32:268–  
456 274. doi: 10.1093/molbev/msu300.
- 457 Siciliano SD, Lean DRS. 2002. Methyltransferase: An enzyme assay for microbial  
458 methylmercury formation in acidic soils and sediments. Environ. Toxicol. Chem. 21:1184–  
459 1190. doi: 10.1002/etc.5620210610.
- 460 Silla-Martínez JM, Capella-Gutiérrez S, Gabaldón T. 2009. trimAl: a tool for automated  
461 alignment trimming in large-scale phylogenetic analyses. Bioinformatics. 25:1972–1973. doi:  
462 10.1093/bioinformatics/btp348.
- 463 Sone Y et al. 2017. A Novel Role of MerC in Methylmercury Transport and  
464 Phytoremediation of Methylmercury Contamination. Biol. Pharm. Bull. 40:1125–1128. doi:  
465 10.1248/bpb.b17-00213.
- 466 Sone Y et al. 2013. Increase methylmercury accumulation in *Arabidopsis thaliana* expressing  
467 bacterial broad-spectrum mercury transporter MerE. AMB Express. 3:52. doi: 10.1186/2191-  
468 0855-3-52.
- 469 Sousa FL, Martin WF. 2014. Biochemical fossils of the ancient transition from geoenergetics  
470 to bioenergetics in prokaryotic one carbon compound metabolism. Biochim. Biophys. Acta  
471 BBA - Bioenerg. 1837:964–981. doi: 10.1016/j.bbabi.2014.02.001.
- 472 Svetlitchnaia T, Svetlitchnyi V, Meyer O, Dobbek H. 2006. Structural insights into  
473 methyltransfer reactions of a corrinoid iron–sulfur protein involved in acetyl-CoA synthesis.  
474 Proc. Natl. Acad. Sci. 103:14331–14336. doi: 10.1073/pnas.0601420103.
- 475 Swofford DL, Olsen GJ, Waddell PJ, Hillis DM. 1996. Phylogenetic inference. In: Molecular

- 476 systematics. Vol. 15 Sinauer Associates, Inc.: Sunderland, Massachusetts pp. 407–514.
- 477 Tada Y, Marumoto K, Takeuchi A. 2020. *Nitrospina*-like bacteria are potential mercury  
478 methylators in the mesopelagic zone in the East China Sea. *Front Microbiol.* 11. doi:  
479 10.3389/fmicb.2020.01369.
- 480 Tada Y, Marumoto K, Takeuchi A, Gralnick JA. 2021. *Nitrospina*-like Bacteria Are  
481 Dominant Potential Mercury Methylators in Both the Oyashio and Kuroshio Regions of the  
482 Western North Pacific. *Microbiol. Spectr.* 9:e00833-21. doi: doi:10.1128/Spectrum.00833-21.
- 483 Tebo BM et al. 2004. Biogenic manganese oxides: properties and mechanisms of formation.  
484 *Annu. Rev. Earth Planet. Sci.* 32:287–328. doi: 10.1146/annurev.earth.32.101802.120213.
- 485 Trevors JT. 1986. Mercury methylation by bacteria. *J. Basic Microbiol.* 26:499–504. doi:  
486 10.1002/jobm.3620260811.
- 487 Tria FDK, Landan G, Dagan T. 2017. Phylogenetic rooting using minimal ancestor deviation.  
488 *Nat. Ecol. Evol.* 1:1–7. doi: 10.1038/s41559-017-0193.
- 489 Villar E, Cabrol L, Heimbürger-Boavida LE. 2020. Widespread microbial mercury  
490 methylation genes in the global ocean. *Env. Microbiol Rep.* doi: 10.1111/1758-2229.12829.
- 491 Wang J, Dai J, Chen G, Jiang F. 2022. Role of sulfur biogeochemical cycle in mercury  
492 methylation in estuarine sediments: A review. *J Hazard Mater.* 423:126964. doi:  
493 <https://doi.org/10.1016/j.jhazmat.2021.126964>.
- 494 Weiss MC, Preiner M, Xavier JC, Zimorski V, Martin WF. 2018. The last universal common  
495 ancestor between ancient Earth chemistry and the onset of genetics. *PLoS Genet.*  
496 14:e1007518. doi: 10.1371/journal.pgen.1007518.
- 497 Zerkle AL et al. 2020. Anomalous fractionation of mercury isotopes in the Late Archean  
498 atmosphere. *Nat. Commun.* 11:1709. doi: 10.1038/s41467-020-15495-3.
- 499 Zerkle AL et al. 2021. Sulfur and mercury MIF suggest volcanic contributions to Earth's  
500 atmosphere at 2.7 Ga. doi: 10.7185/geochemlet.2124.

501

## 502 **Figure Legends**

503 **Figure 1. Phylogenetic tree of the protein family PF03599.** (A) Unrooted tree of the protein  
504 family PF03599. The tree was inferred by using the Maximum Likelihood method under  
505 LG+C50+F+R model. This analysis involved 478 amino acid sequences with a total of 2922  
506 positions in the alignments. Different taxonomies are represented by different colors.  
507 Ultrafast bootstrap support values were calculated with 1000 replications, and ultrafast

508 bootstrap values > 90% are shown by black dots at the nodes. (B) PF03599 tree rooted by the  
509 midpoint. Clades whose average branch length distance to their leaves are below 1.5 are  
510 collapsed with iTOL for better visualization.

511

512 **Figure 2. Phylogenetic tree of HgcA proteins.** The tree was inferred by using the Maximum  
513 Likelihood method under LG+C60+F+G model. This analysis involved alignment of 169  
514 amino acid sequences with a total of 493 positions. Different taxonomies are represented by  
515 different colors. Ultrabootstrap support values were calculated with 1000 replications, and  
516 ultrabootstrap values > 90% are shown by black dots at the nodes. Experimentally validated  
517 functional and non-functional HgcA sequences are labelled by solid and hollow stars. Fused-  
518 HgcAB sequences are indicated by a grey background.

519

520 **Figure 3. Co-phylogenetic tree of HgcA and HgcB.** The phylogeny of HgcA shown on the  
521 left is the same as Figure 2. The phylogeny of HgcB shown on the right was inferred by using  
522 the Maximum Likelihood method under LG+C60+F+G model. This analysis involved  
523 alignment of 169 amino acid sequences with a total of 322 positions. Taxonomies of the  
524 HgcB sequences are represented in the same colors as shown in the HgcA phylogeny.  
525 Ultrabootstrap support values were calculated with 1000 replications, and ultrabootstrap  
526 values > 90% are shown by black dots at the nodes. Gray shaded blocks describe fused-  
527 HgcAB and ‘HgcB tail’ genes in the two trees, respectively. Lines connecting the co-  
528 phylogenies demonstrate associations between the two trees. The green dots at the tip of the  
529 HgcA tree represent the corresponding *hgcA* without downstream *hgcB*, and the red triangle  
530 represents the corresponding fused-*hgcAB* with another *hgcB* downstream.

531

532 **Figure 4. Phylogenetic tree of MerB proteins.** The tree was inferred by using the Maximum  
533 Likelihood method under LG+C40+F+G model. This analysis involved alignment of 225  
534 amino acid sequences with a total of 1547 positions. Different taxonomies are represented by  
535 different colors. Ultrabootstrap support values were calculated with 1000 replications, and  
536 ultrabootstrap values > 90% are shown by black dots at the nodes. The tree was rooted using  
537 two MerA proteins.

538

539 **Figure 5. Species tree of *hgcA*+ and *merB*+ genomes in the RP35 database.** The tree was  
540 inferred by using the Maximum Likelihood method under LG+F+R10 model. This analysis  
541 involved alignment of 251 amino acid sequences with a total of 8024 positions. Different  
542 taxonomies are represented by different colors. The presence of genes *hgcA*/fused  
543 *hgcAB/hgcB/merB* in the genomes were represented by different symbols and colors in the  
544 outer circle. Ultrabootstrap support values were calculated with 1000 replications, and  
545 ultrabootstrap values > 90% are shown by black dots at the nodes.

546

**A**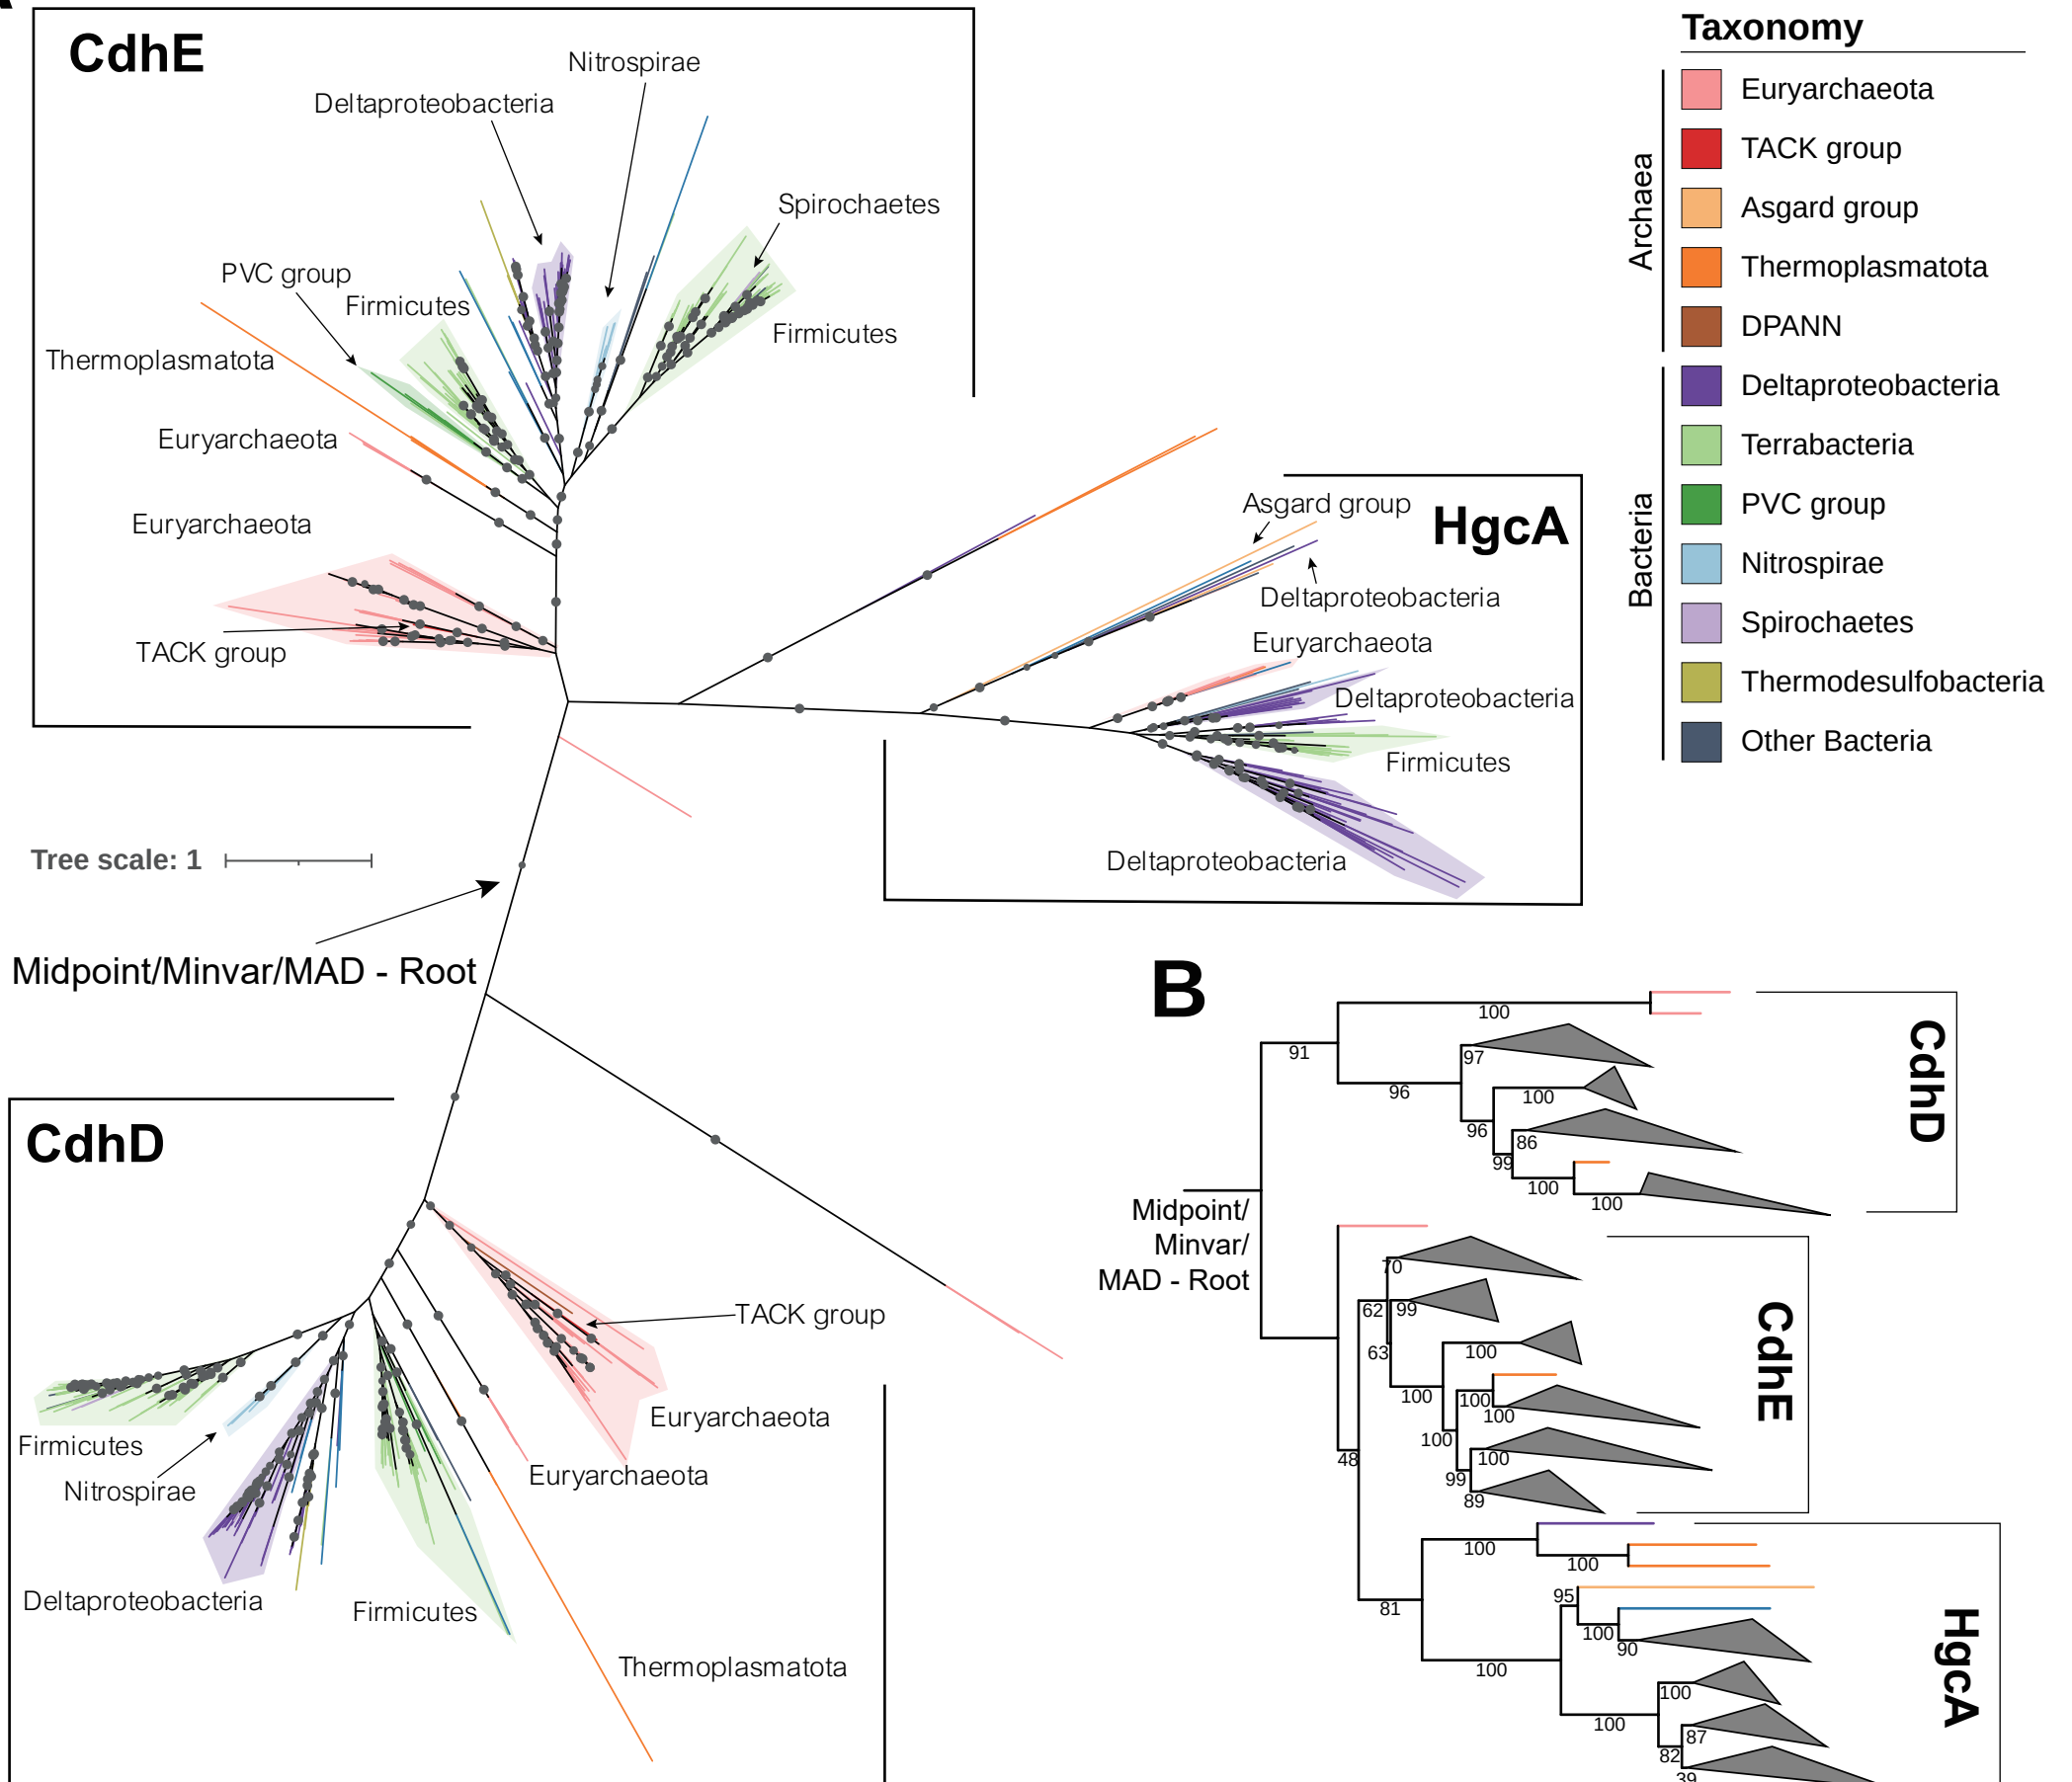

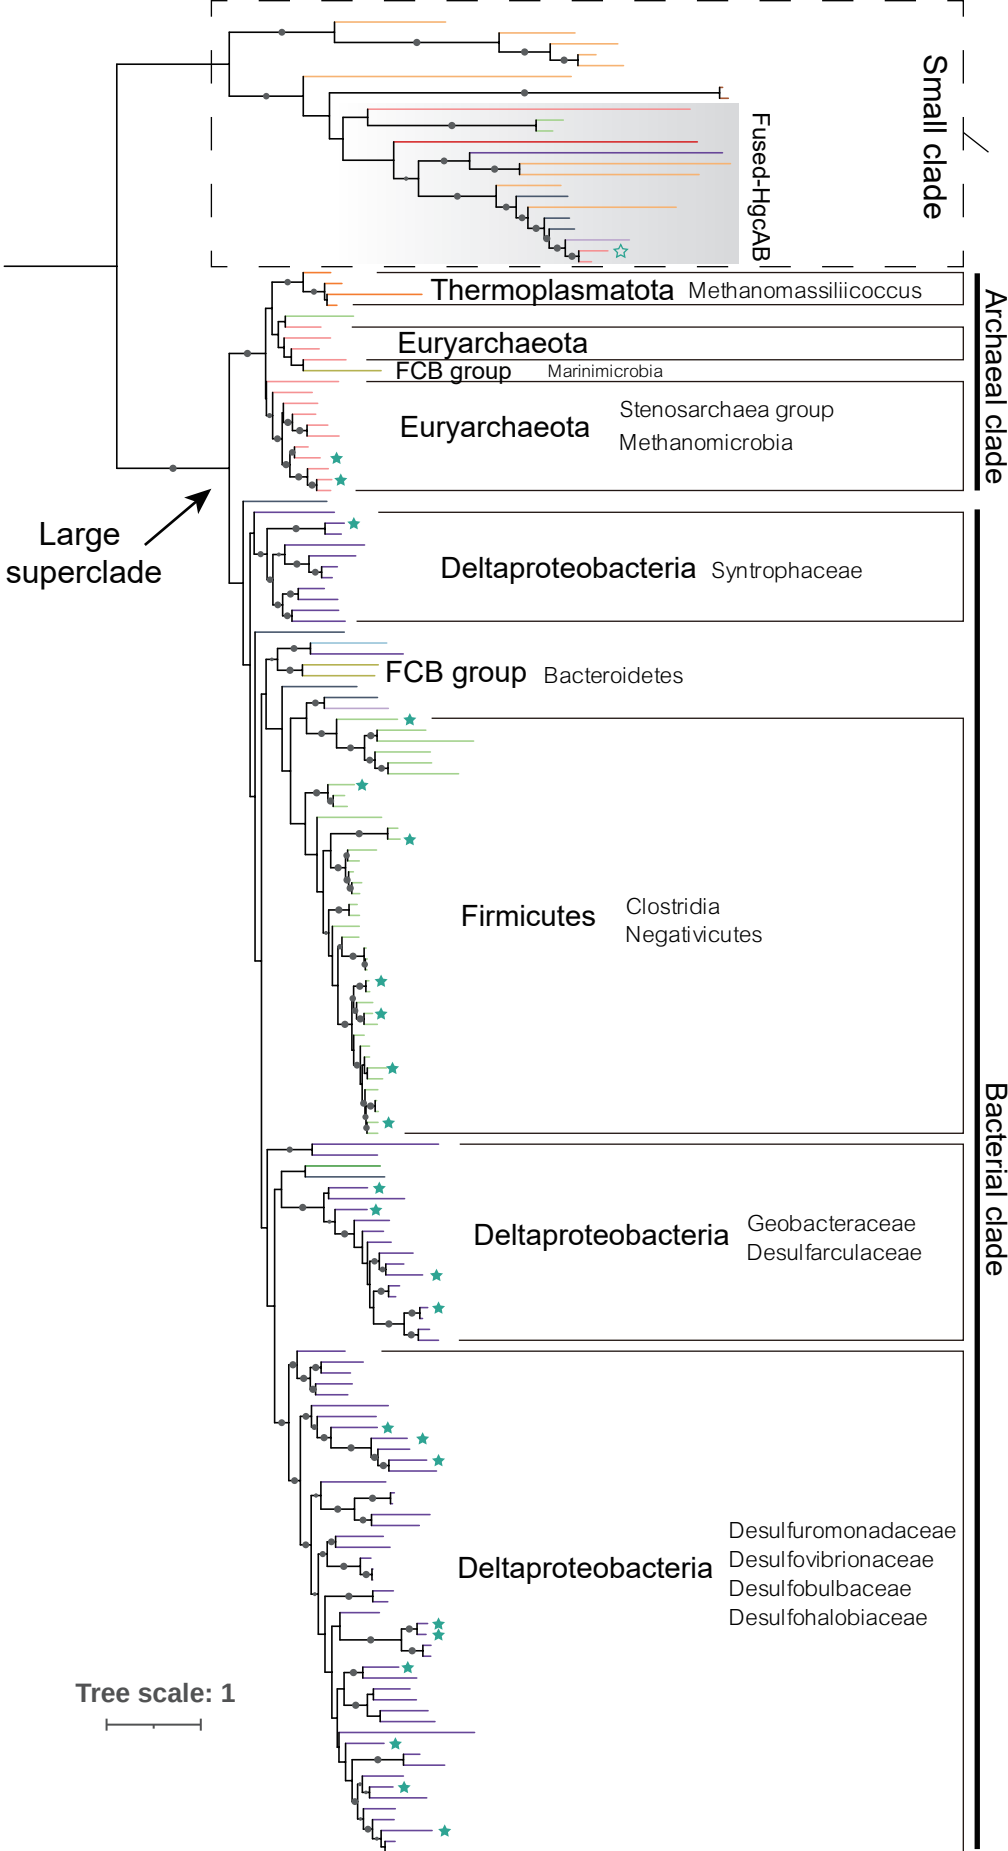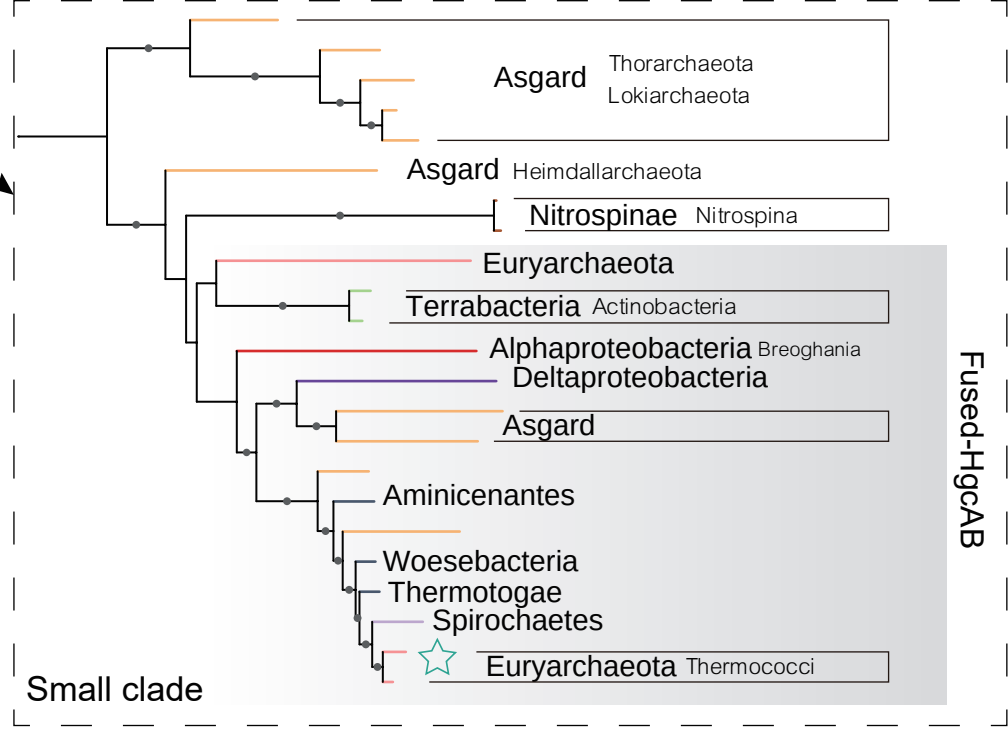

- ★ Experimentally validated functional
- ☆ Experimentally validated non-functional

**Taxonomy**

- Archaea
  - Euryarchaeota
  - Asgard group
  - Thermoplasmatota
  - Nitrospinae
- Bacteria
  - Deltaproteobacteria
  - Terrabacteria
  - PVC group
  - Nitrospirae
  - Spirochaetes
  - FCB group
  - Alphaproteobacteria
  - Other Bacteria

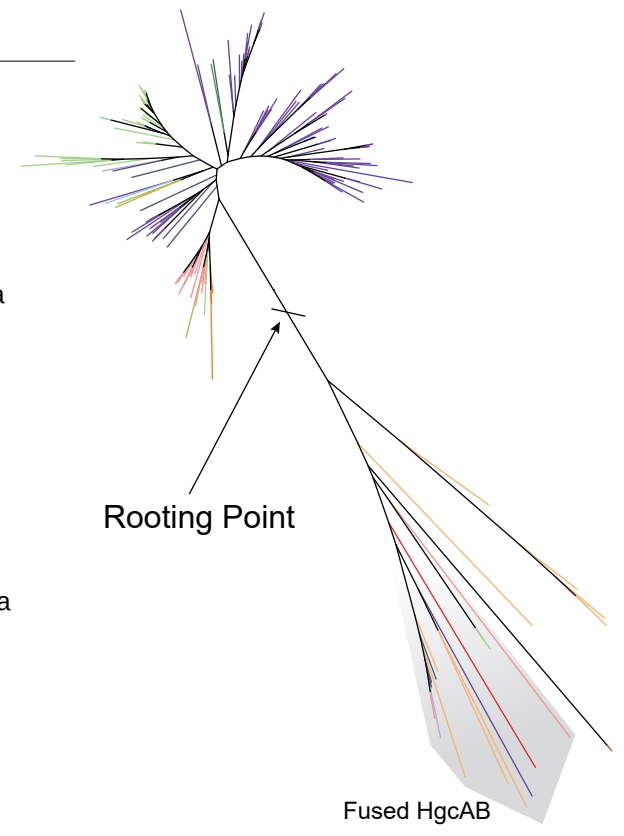

# HgcA Tree

# HgcB Tree

Tree scale: 1

- Taxonomy**
- Euryarchaeota
  - Asgard group
  - Thermoplasmatota
  - Nitrospinae
  - Deltaproteobacteria
  - Terrabacteria
  - PVC group
  - Nitrospirae
  - Spirochaetes
  - FCB group
  - Alphaproteobacteria
  - Other Bacteria

- Associations
- hgcA* without downstream *hgcB*
- Fused-*hgcAB* with a downstream *hgcB*

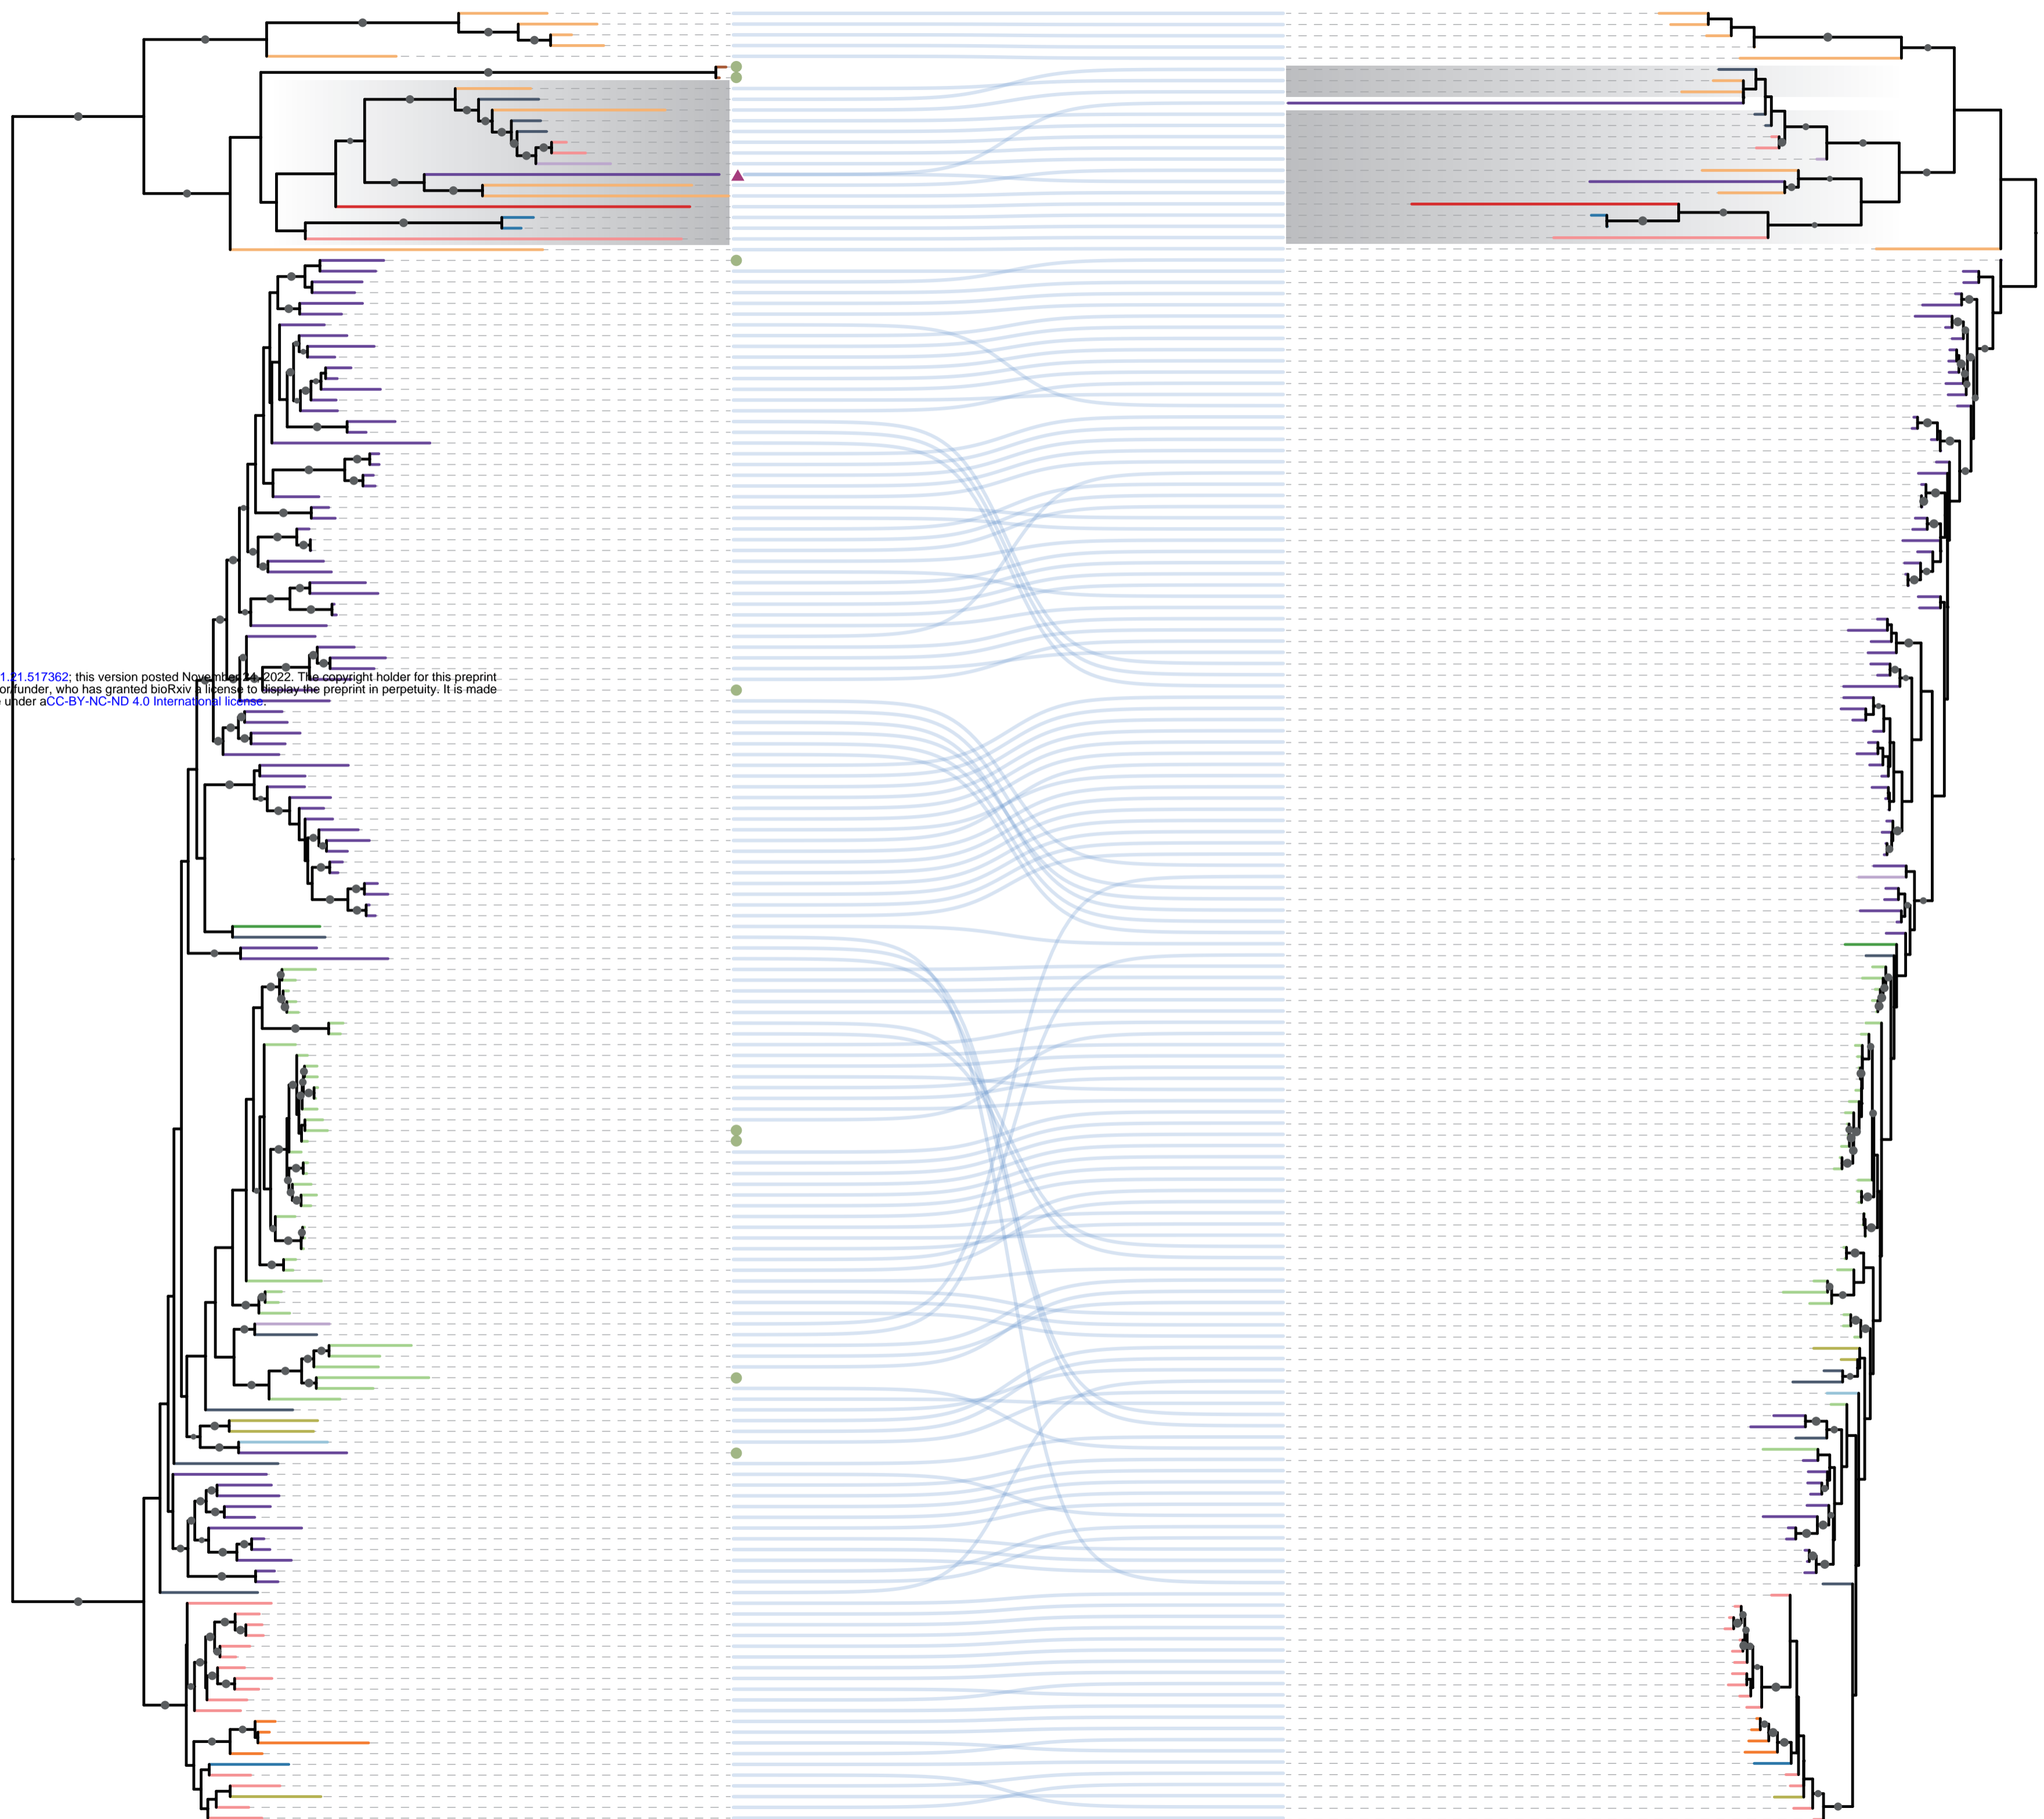



Tree scale: 1

**Taxonomy**

- Euryarchaeota
- TACK group
- FCB group
- Deltaproteobacteria
- Gammaproteobacteria
- Betaproteobacteria
- Alphaproteobacteria
- Firmicutes
- Chloroflexi
- Actinobacteria
- Acidobacteria
- Other Bacteria

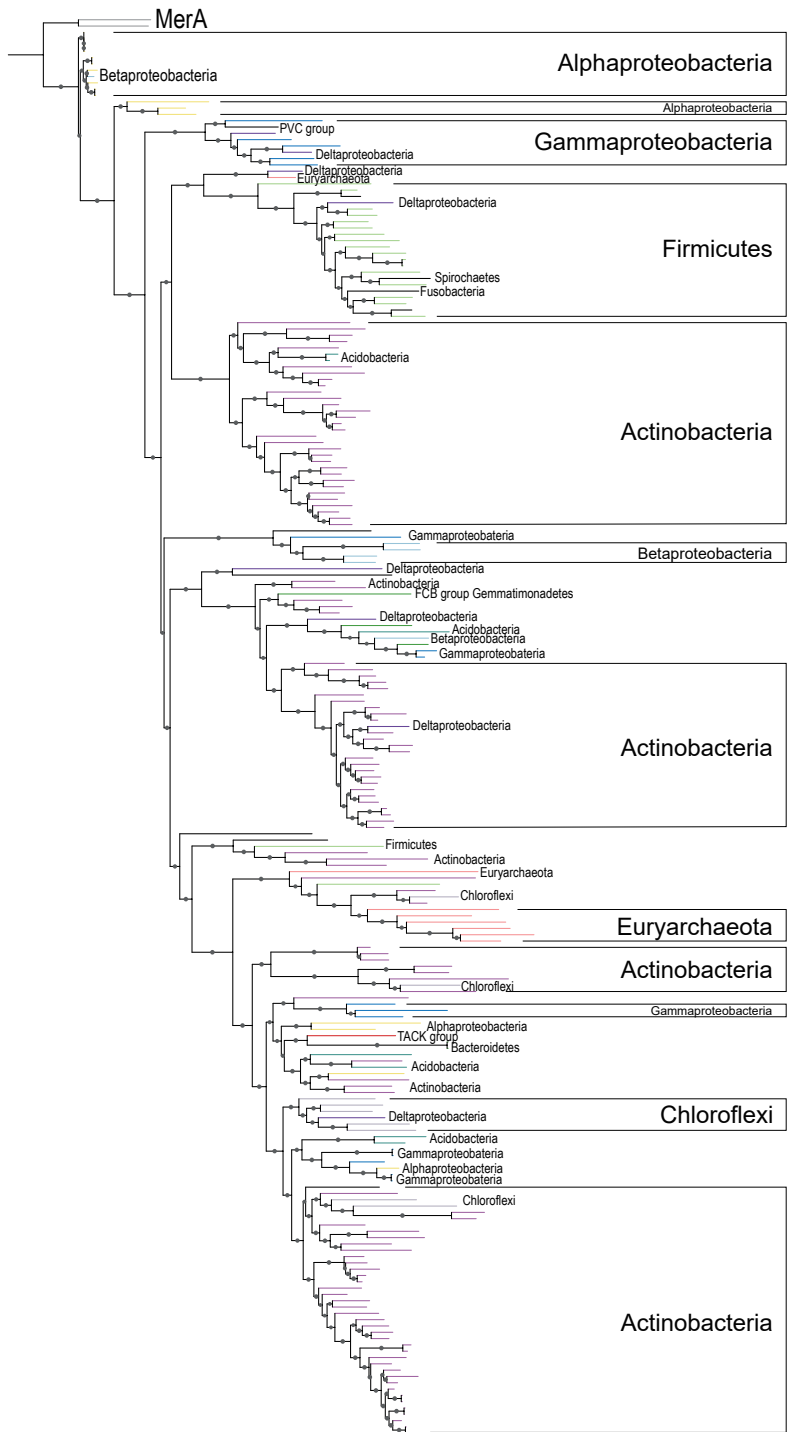

| Taxonomy                               |                     |
|----------------------------------------|---------------------|
| <span style="color: #f08080;">■</span> | Euryarchaeota       |
| <span style="color: #d62728;">■</span> | TACK group          |
| <span style="color: #ff9966;">■</span> | Asgard group        |
| <span style="color: #ff7f0e;">■</span> | Thermoplasmatota    |
| <span style="color: #8c564b;">■</span> | DPANN               |
| <span style="color: #2ca02c;">■</span> | FCB group           |
| <span style="color: #9467bd;">■</span> | Deltaproteobacteria |
| <span style="color: #1f77b4;">■</span> | Gammaproteobacteria |
| <span style="color: #aec7e8;">■</span> | Betaproteobacteria  |
| <span style="color: #ffbb78;">■</span> | Alphaproteobacteria |
| <span style="color: #98df8a;">■</span> | Firmicutes          |
| <span style="color: #d9d9d9;">■</span> | Chloroflexi         |
| <span style="color: #9467bd;">■</span> | Actinobacteria      |
| <span style="color: #000000;">■</span> | Other Bacteria      |

| Gene                                   |                     |
|----------------------------------------|---------------------|
| <span style="color: #d62728;">◀</span> | <i>hgcA</i>         |
| <span style="color: #9467bd;">◀</span> | Fused- <i>hgcAB</i> |
| <span style="color: #2ca02c;">▶</span> | <i>hgcB</i>         |
| <span style="color: #1f77b4;">●</span> | <i>merB</i>         |

Tree scale: 1

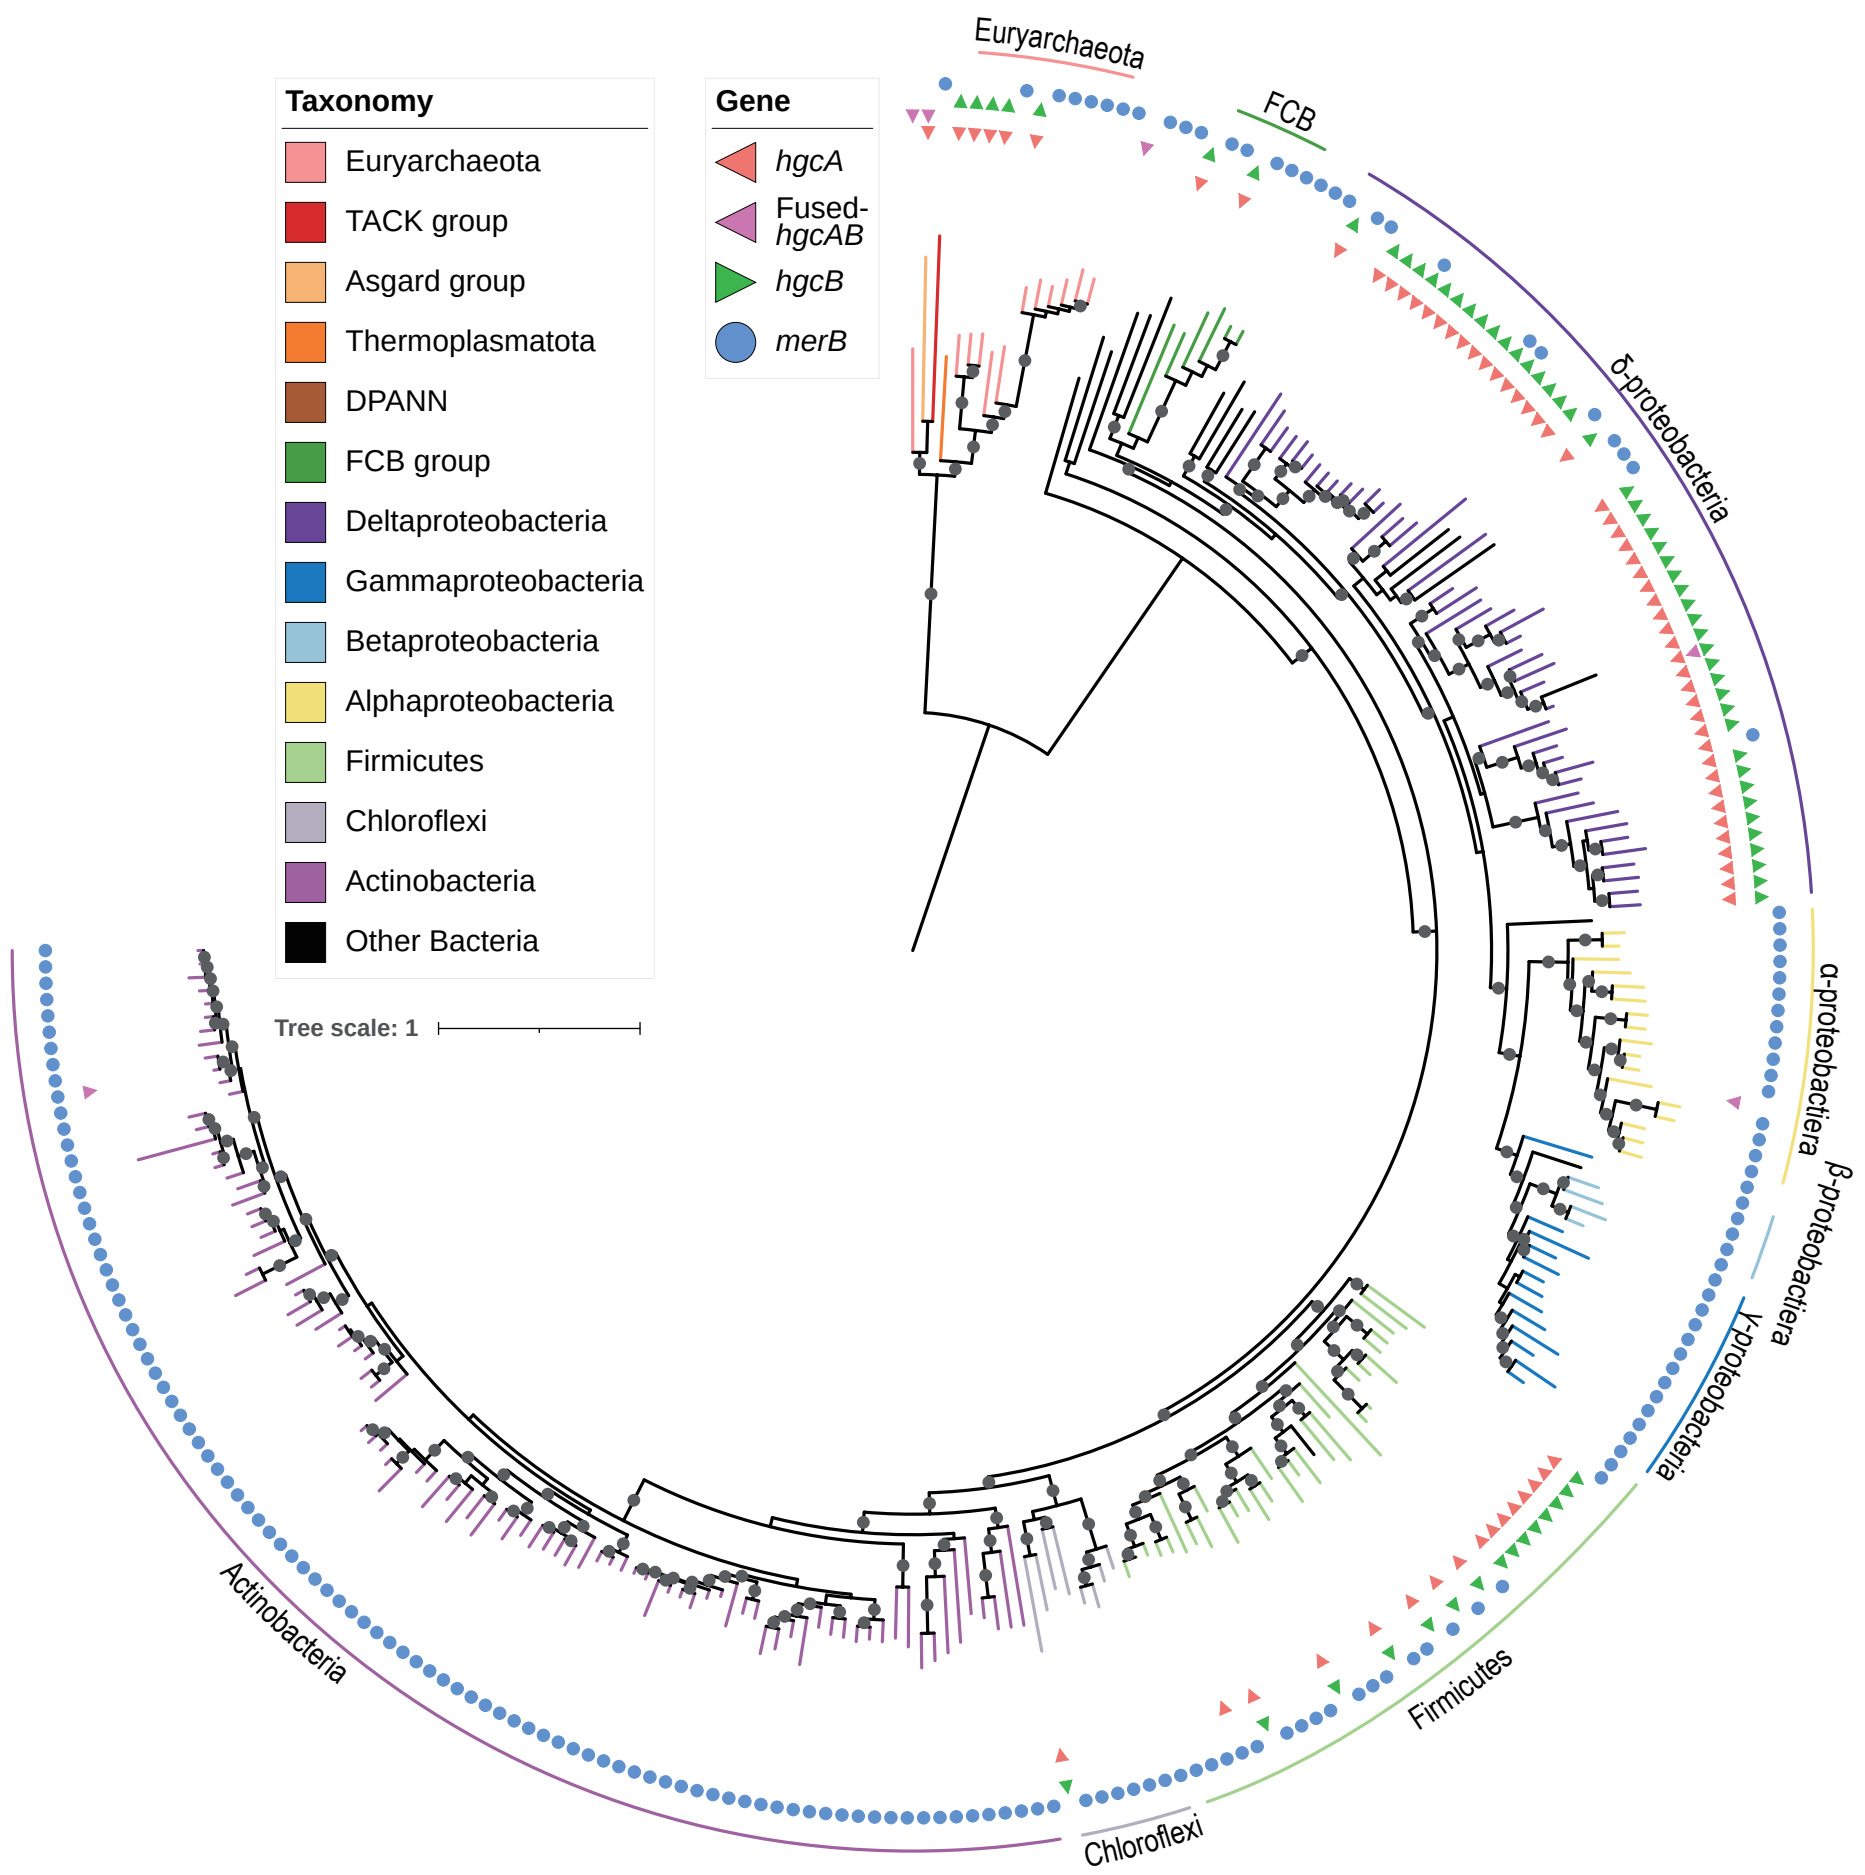

Source: https://www.biorxiv.org/content/10.1101/2022.11.21.517362v1.full.pdf
